# Supplementary material for: Rapid and direct MALDI-MS identification of pathogenic bacteria from blood using ionic liquid-modified magnetic nanoparticles (Fe3O4@SiO2)
Source: Royal Society of Chemistry journal article supplement (doi:10.1039/c4tb00528g), 2014-01-01
Supplement: c4tb00528g1.pdf [file c4tb00528g1.pdf]

## **Rapid and direct MALDI-MS identification of pathogenic bacteria from blood via ionic liquid-modified magnetic nanoparticles ( $\text{Fe}_3\text{O}_4@ \text{SiO}_2$ )**

Mukesh L. Bhaisare<sup>1§</sup>, Hani Nasser Abdelhamid<sup>1, 2§</sup>, Bo-Sgum Wu<sup>1</sup>, and Hui-Fen Wu<sup>1, 3, 4, 5, 6\*</sup>

<sup>1</sup>Department of Chemistry, National Sun Yat-Sen University, Kaohsiung, 70, Lien-Hai Road, Kaohsiung, 80424, Taiwan

<sup>2</sup>Department of Chemistry, Assuit University, Assuit, 71515, Egypt

<sup>3</sup>School of Pharmacy, College of Pharmacy, Kaohsiung Medical University, Kaohsiung, 806, Taiwan

<sup>4</sup>Institute of Medical Science and Technology, National Sun Yat-Sen University, 80424, Taiwan

<sup>5</sup>Doctoral Degree Program in Marine Biotechnology, National Sun Yat-Sen University, Kaohsiung, 80424, Taiwan

<sup>6</sup>Center for Nanoscience and Nanotechnology, National Sun Yat-Sen University, 70, Lien-Hai Road, Kaohsiung, 80424, Taiwan

\*Corresponding author, Phone: +886-7-5252000-3955; Fax: +886-7-5253908

E-mail: [hwu@faculty.nsysu.edu.tw](mailto:hwu@faculty.nsysu.edu.tw) (Prof. H.F.Wu)

§The authors (co-first authors) contributed equally to this work.

Fig.S1

Abundance

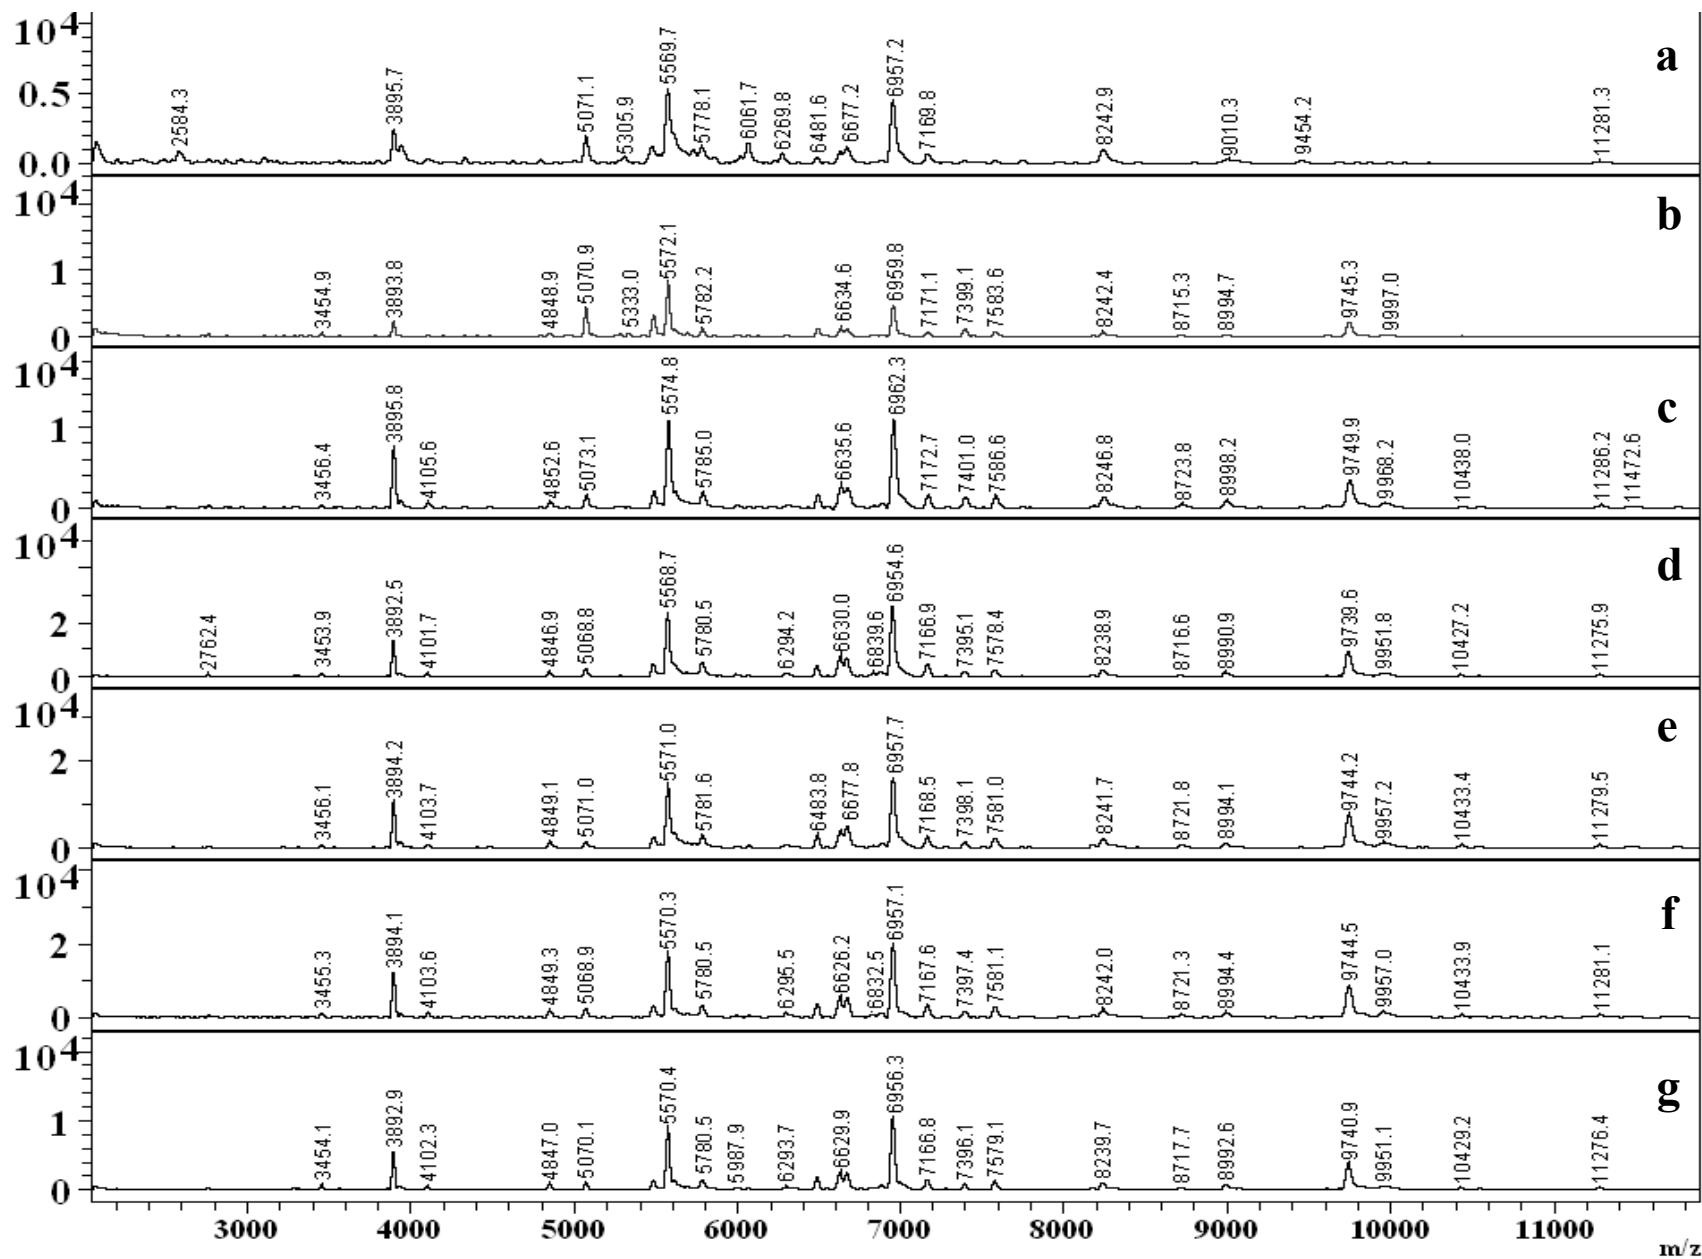

Fig. S1. Volume effects of CILMS on capture of *S. aureus* with (a) bacteria control, (b) 2.0, (c) 5.0, (d) 10, (e) 15, (f) 20, and (g) 25  $\mu$ L CILMS.

Fig.S2

Abundance

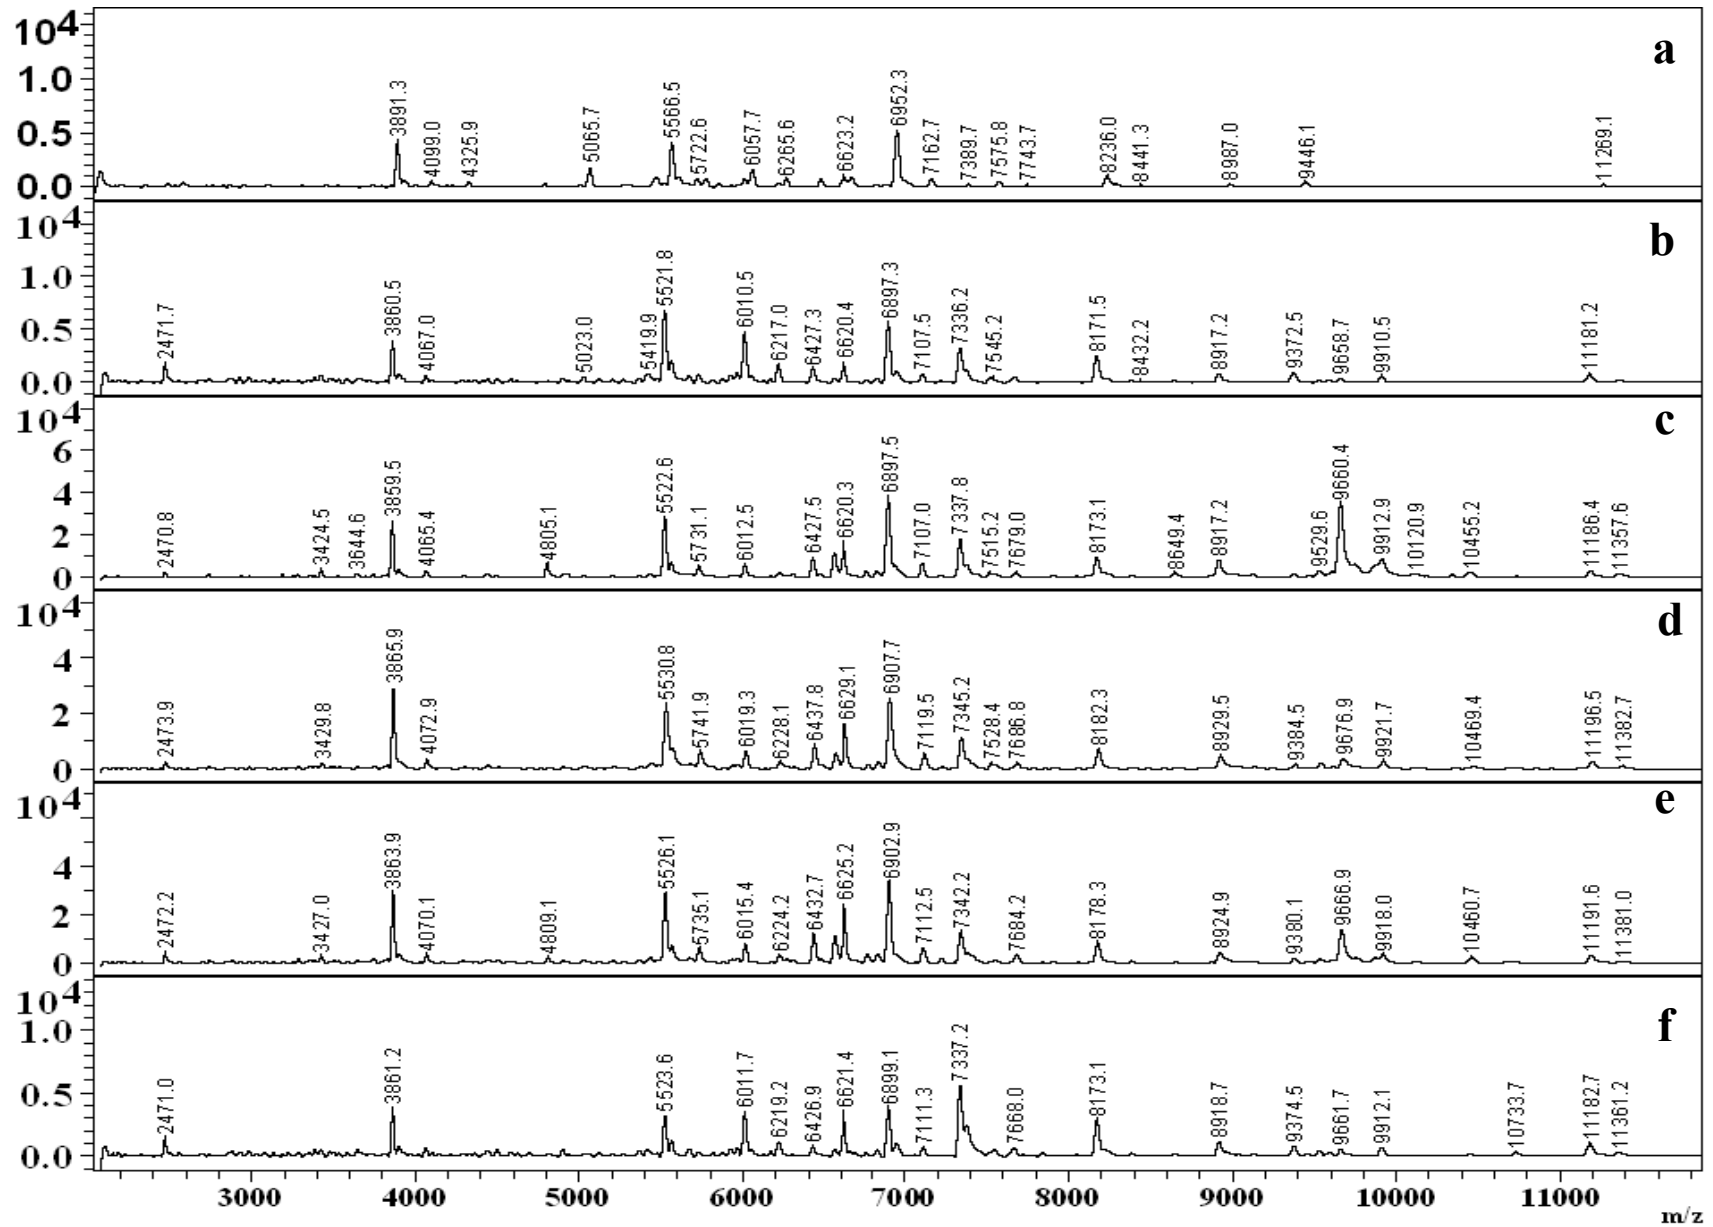

Fig. S2. Incubation time effect on the capture of *S. aureus* (2.9 × 10<sup>11</sup> cfu mL<sup>-1</sup>) with 10 μL CILMS and (a) bacteria control, (b) 2, (c) 5, (d) 10, (e) 15, and (f) 20 min.

Fig.S3

Abundance

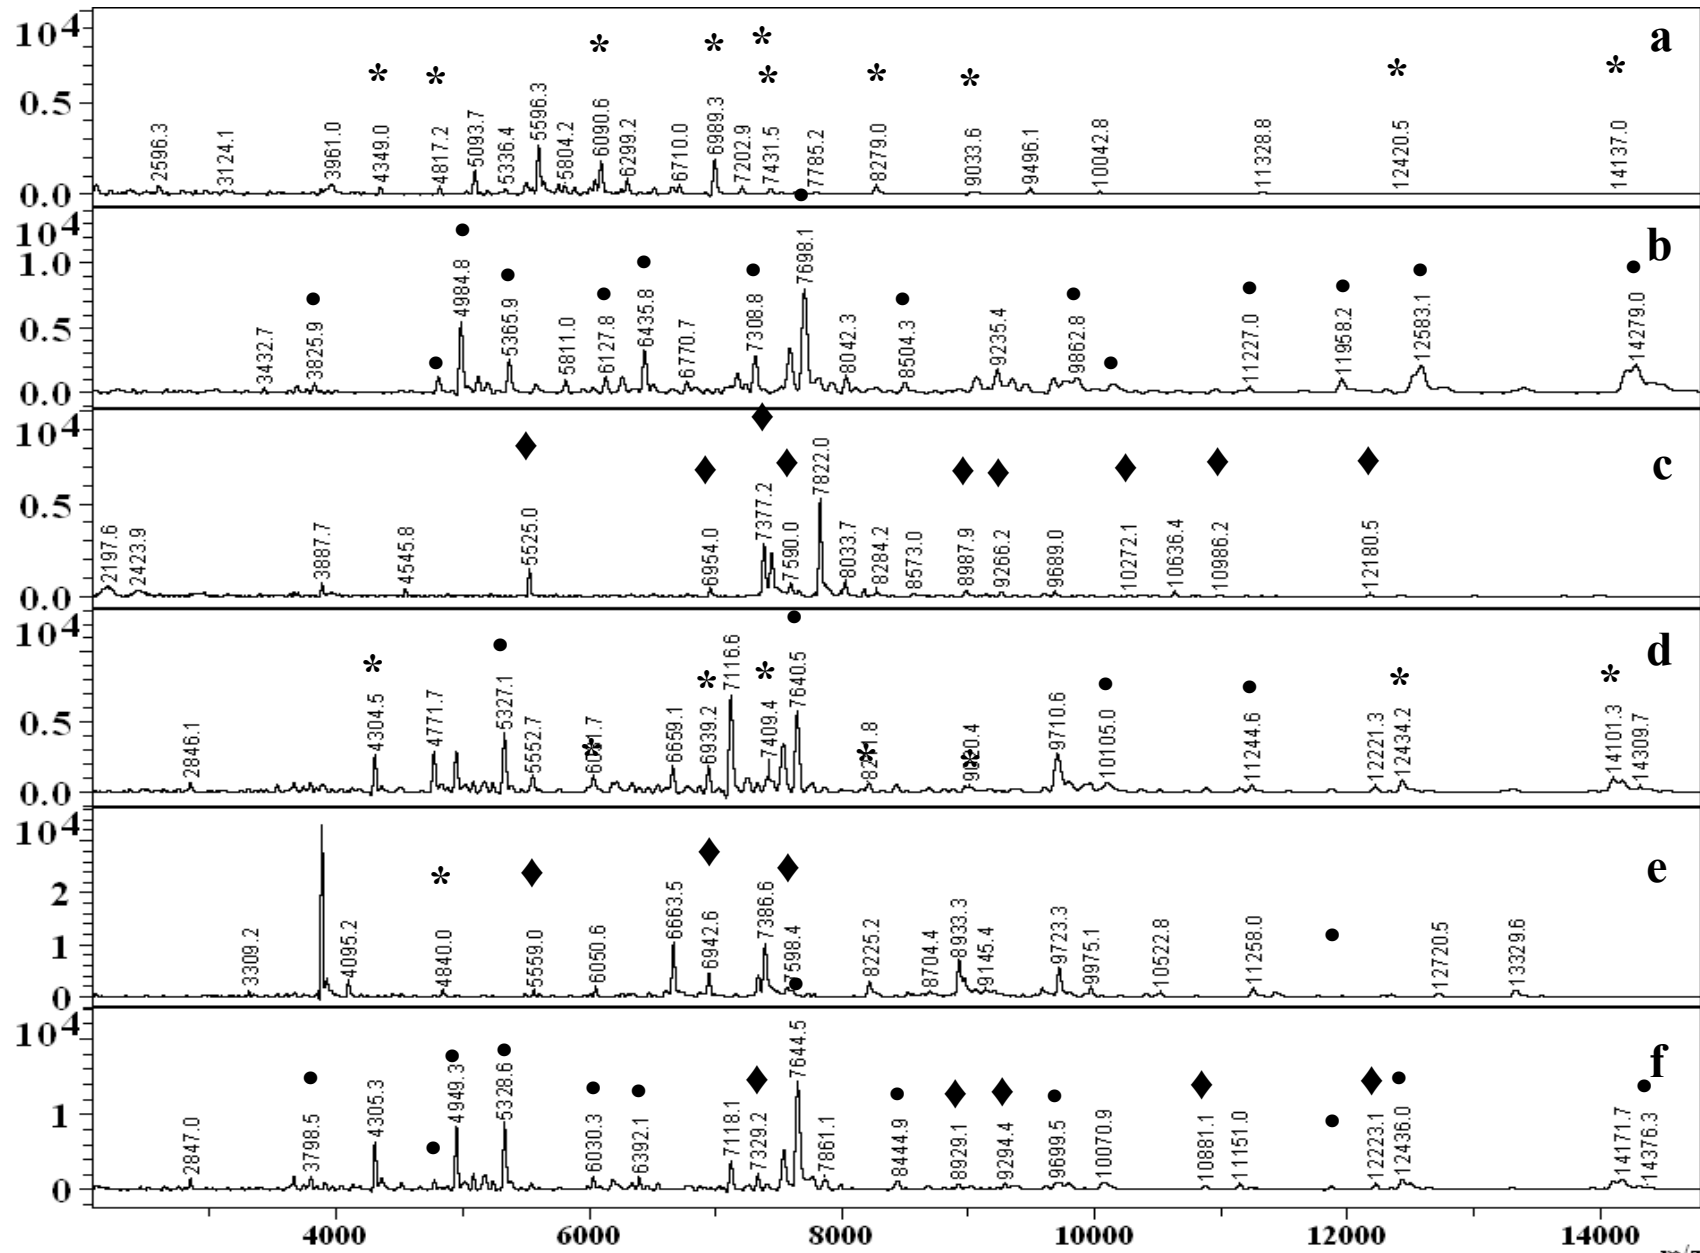

Fig. S3. The evaluation of bacterial selectivity of CILMS with (a) *S. aureus* control ( $1.7 \times 10^{13}$  cfu mL<sup>-1</sup>), (b) *P. aeruginosa* control ( $3.6 \times 10^{13}$  cfu mL<sup>-1</sup>), (c) *E. coli* control ( $4.1 \times 10^{13}$  cfu mL<sup>-1</sup>), (d) *P. aeruginosa* and *S. aureus*, (e) *E. coli* and *S. aureus*, and (f) *E. coli* and *P. aeruginosa*.

Fig.S4

Abundance

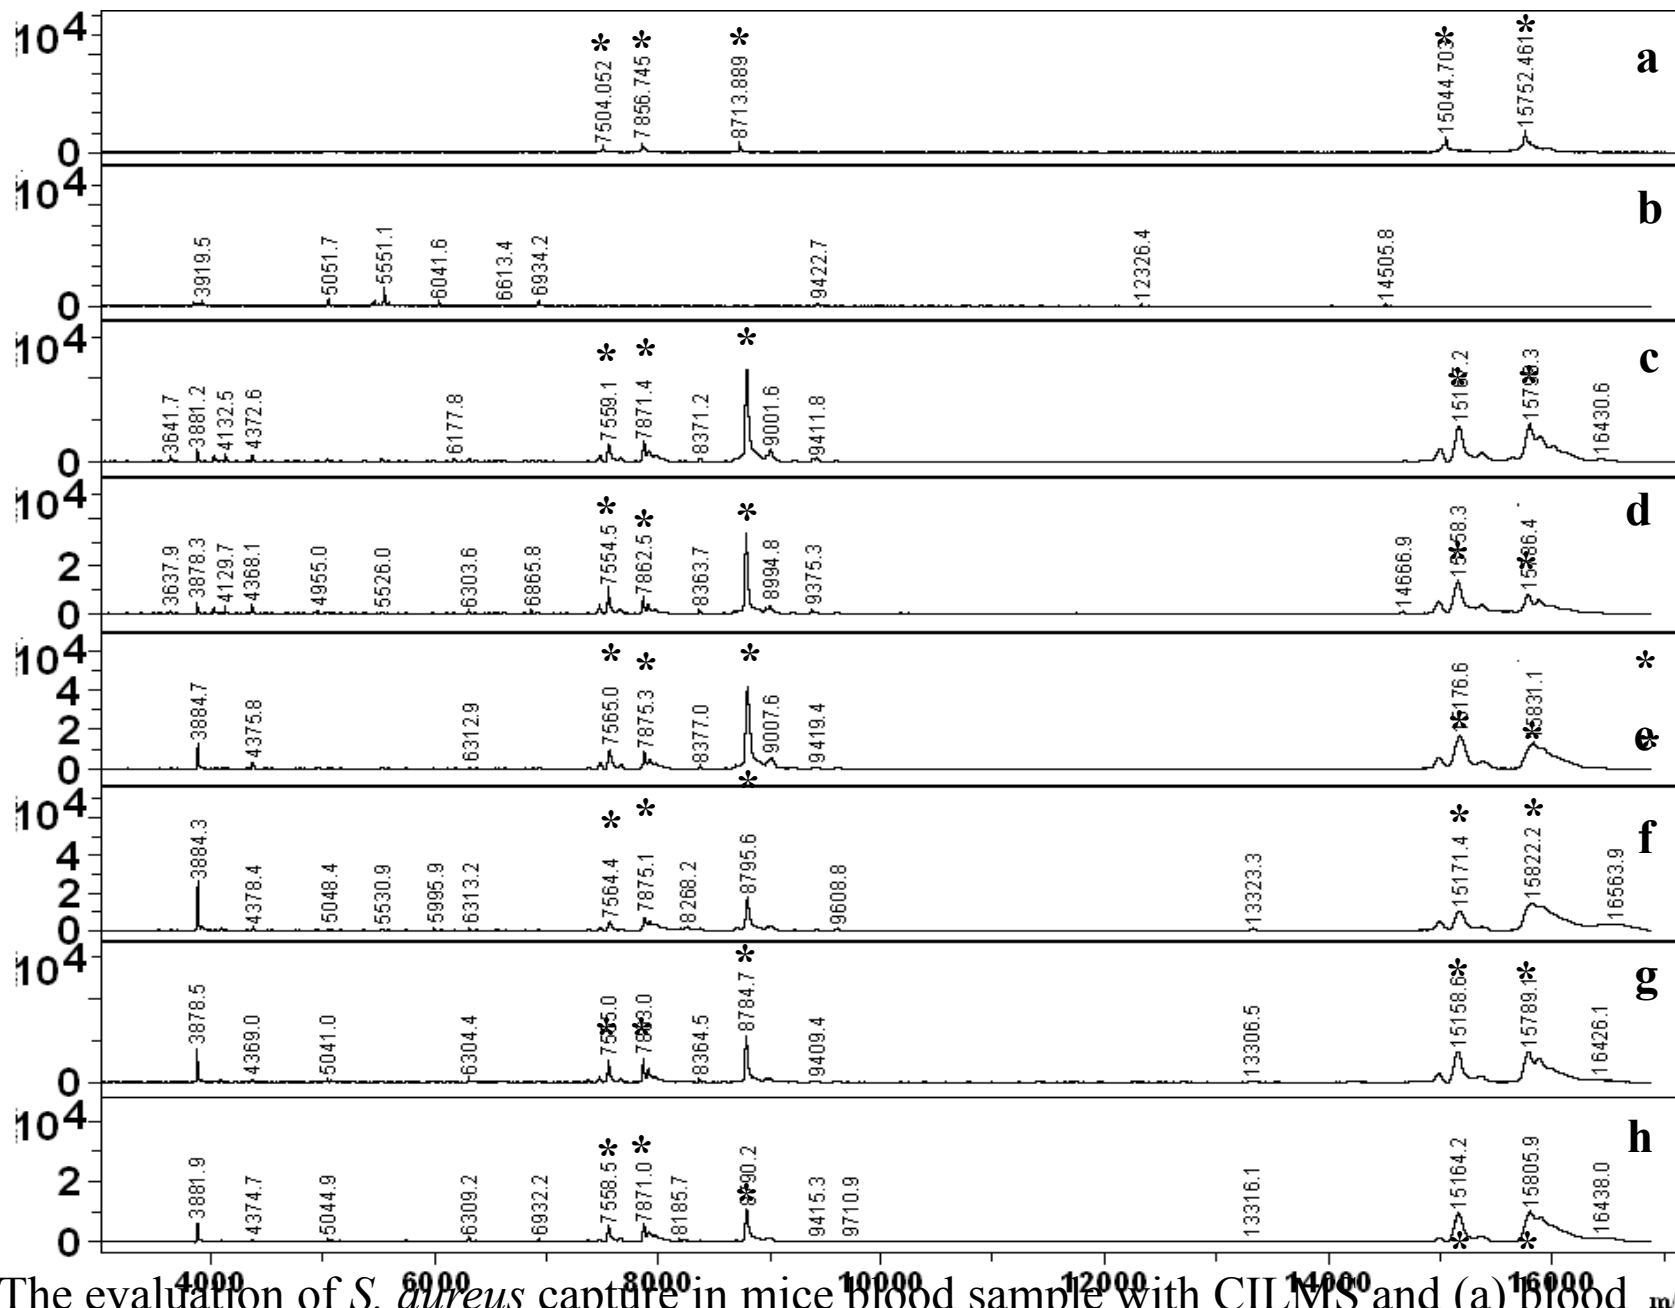

Fig. S4. The evaluation of *S. aureus* capture in mice blood sample with CILMS and (a) blood control, (b) bacteria control, (c) 0.5, (d) 1.0, (e) 3.0, (f) 10, (g) 20, and (h) 30  $\mu\text{L}$  *S. aureus* ( $7.8 \times 10^{13}$  cfu  $\text{mL}^{-1}$ ).

Fig.S5

Abundance

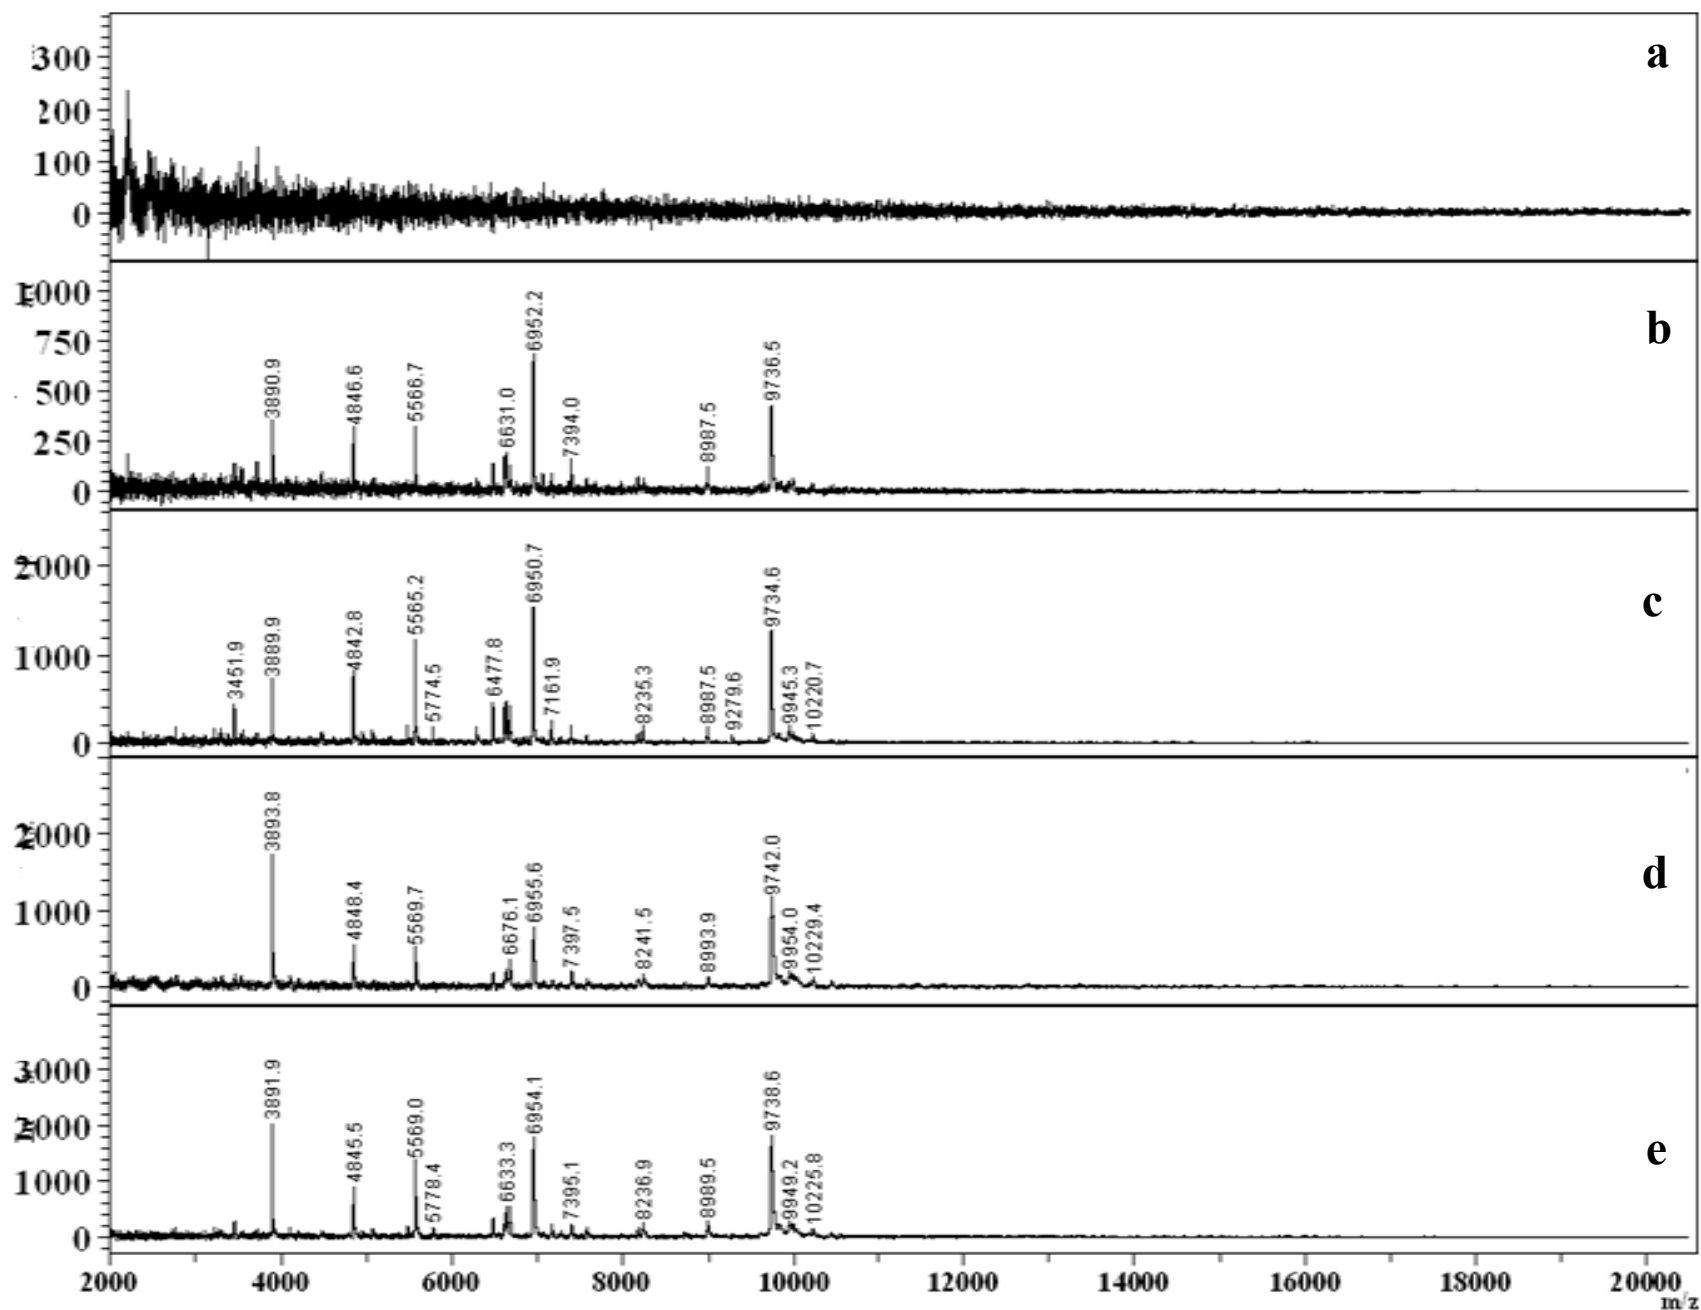

Fig. S5. LOD determination of *S. aureus* from (a)  $3.1 \times 10^2$ , (b)  $4.2 \times 10^3$ , (c)  $5.8 \times 10^4$ , (d)  $7.2 \times 10^5$ , and (e)  $8.9 \times 10^6$  cfu mL<sup>-1</sup> *S. aureus* with CILMS.

Fig.S6

# Abundance

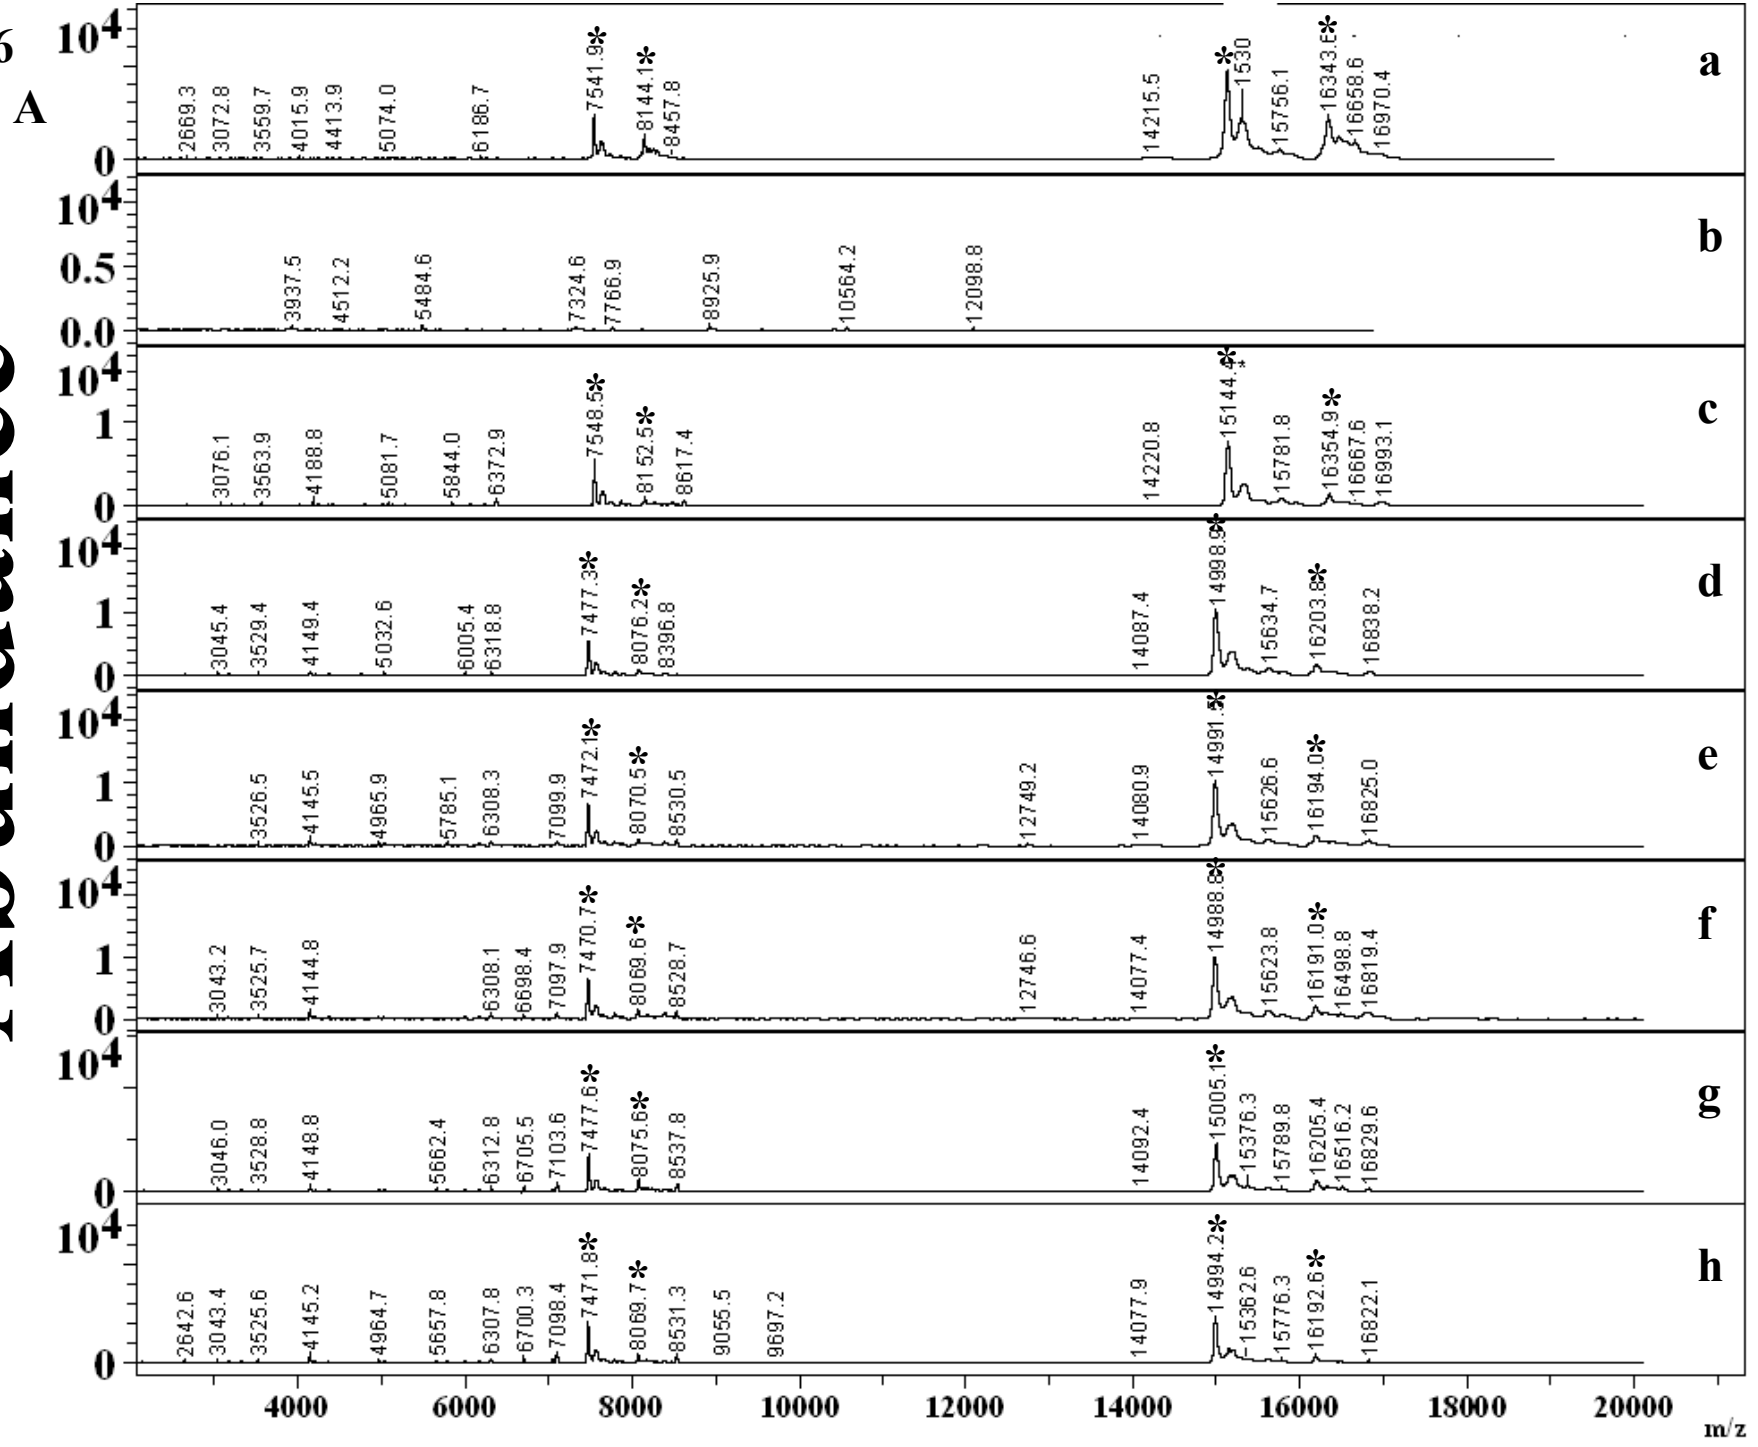

Fig.S6

# Abundance

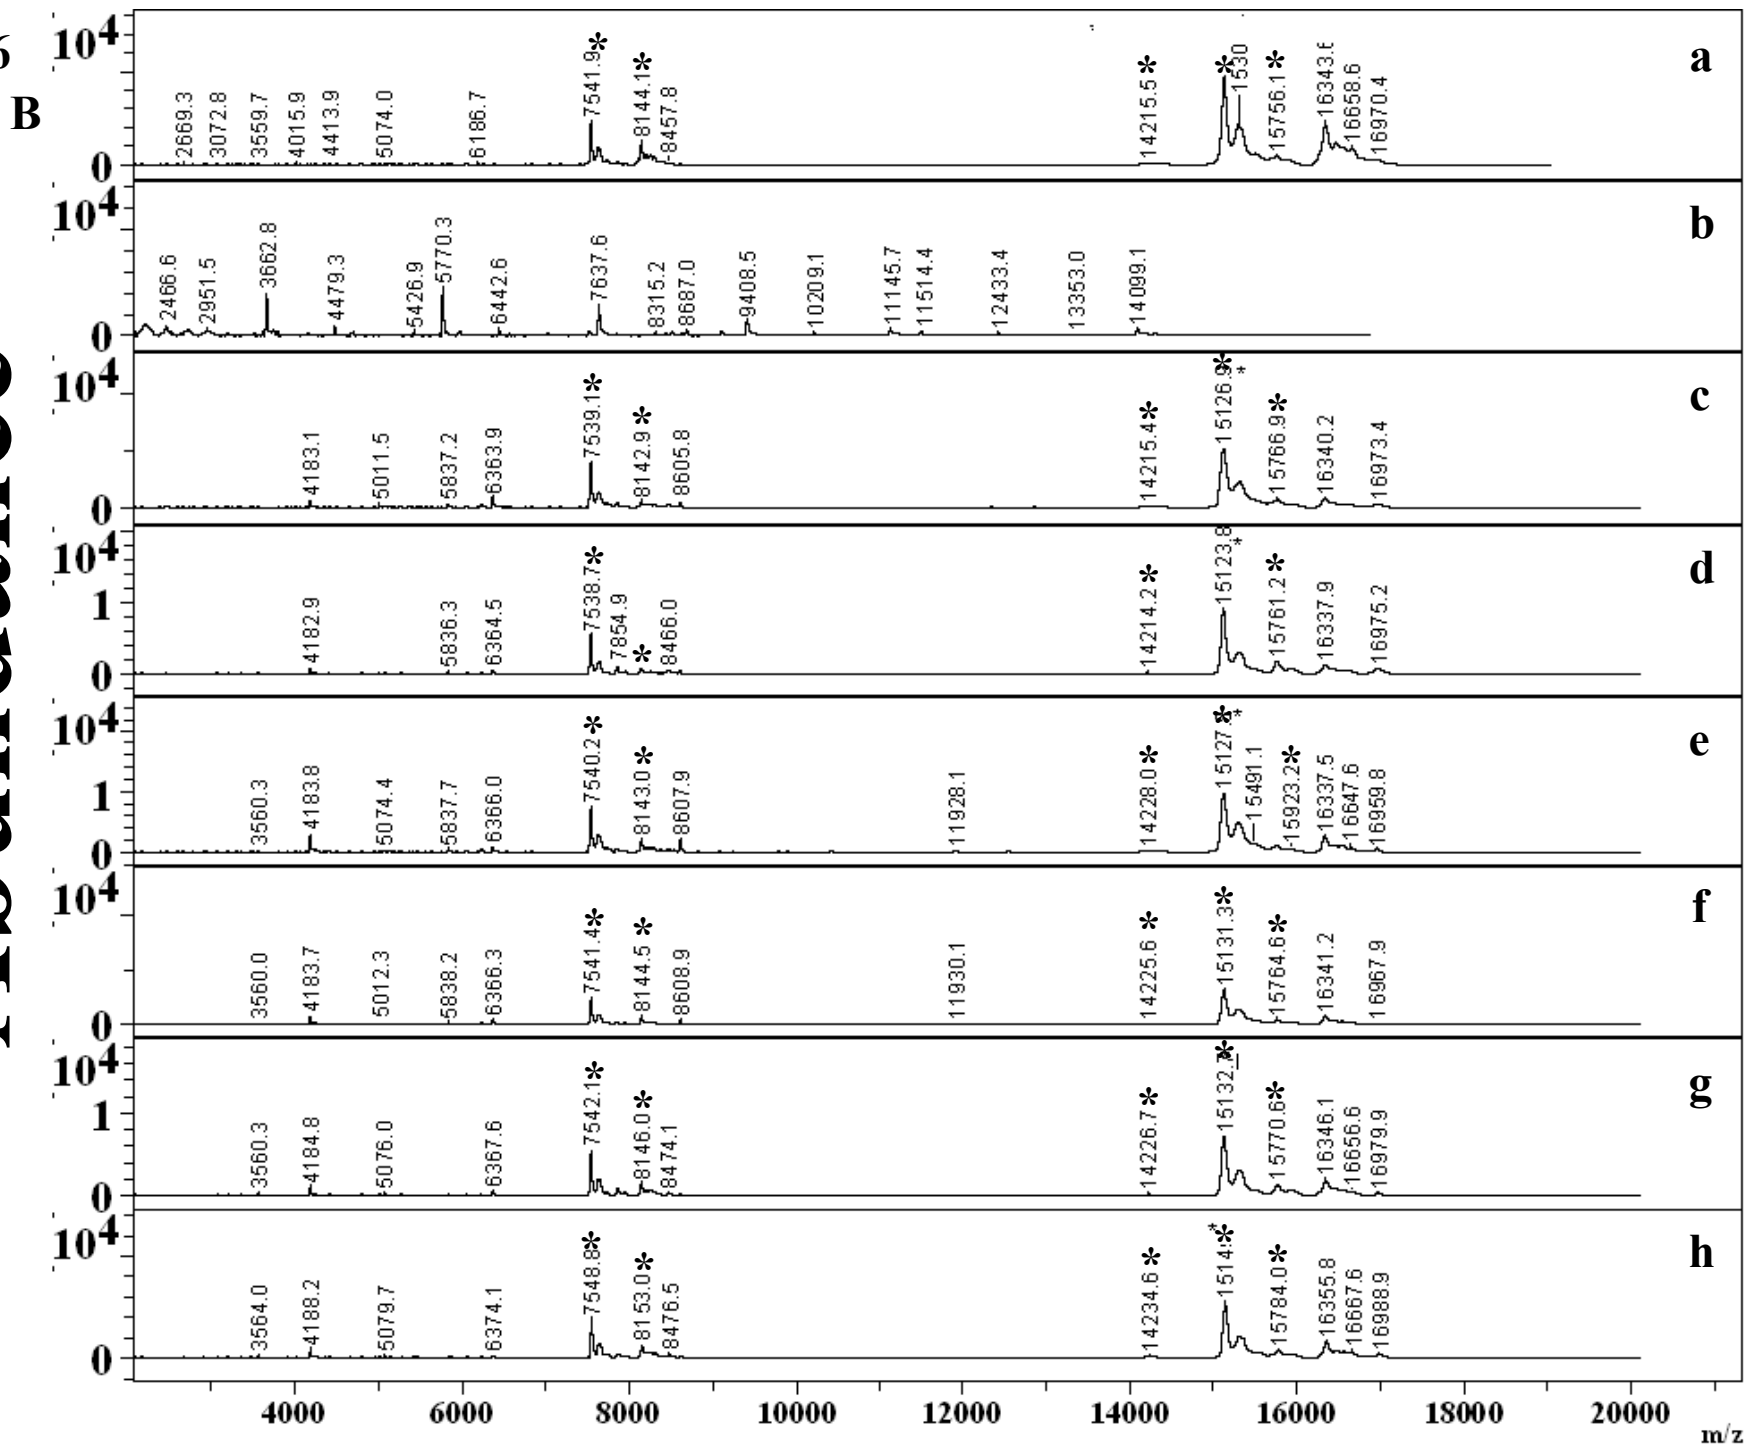



Fig.S6

# Abundance

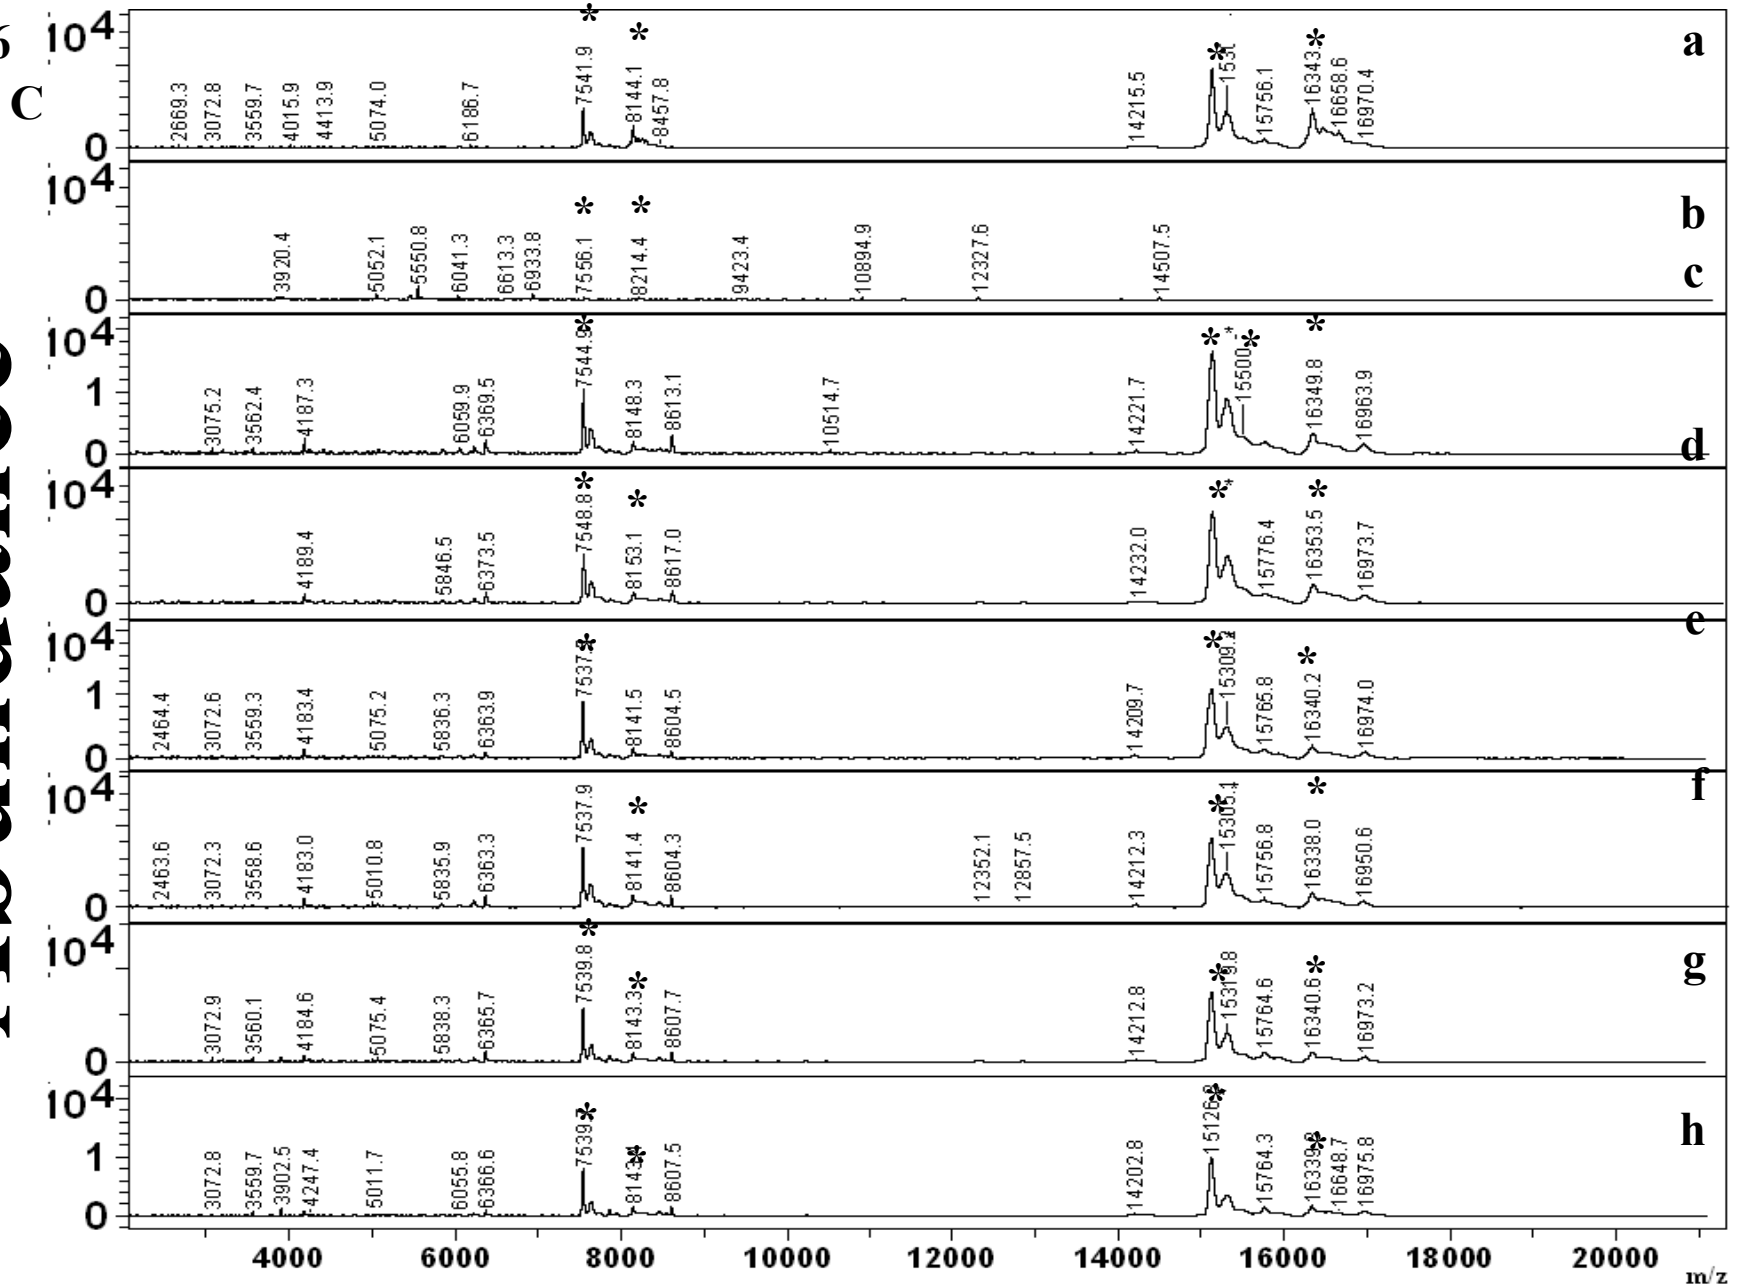

**Fig. S6.** (A) The evaluation of *E. coli* capture in sheep blood sample with CILMS and (a) blood control, (b) bacteria control, (c) 0.5, (d) 1.0, (e) 3.0, (f) 10, (g) 20, and (h) 30  $\mu\text{L}$  *E. coli* ( $8.5 \times 10^{12}$  cfu  $\text{mL}^{-1}$ ), and the same conditions with (B) *P. aeruginosa* ( $1.7 \times 10^{13}$  cfu  $\text{mL}^{-1}$ ) and (C) *S. aureus* ( $7.5 \times 10^{13}$  cfu  $\text{mL}^{-1}$ ).
